# Supplementary material for: Upregulation of fascin-1 is involved in HIF-1α-dependent invasion and migration of hypopharyngeal squamous cell carcinoma
Source: PubMed Central journal article supplement — Int J Oncol. 2019 Jun 19;55(2):488–98. doi: 10.3892/ijo.2019.4827 (PMC6615917; doi:10.3892/ijo.2019.4827), 2019-06-19

Figure S1. Kaplan-Meier analysis of the overall survival of patients with HSCC according to fascin-1 expression. Fascin-1 expression was not associated with 3-year survival.  $P=0.365$  was determined using the log-rank test.

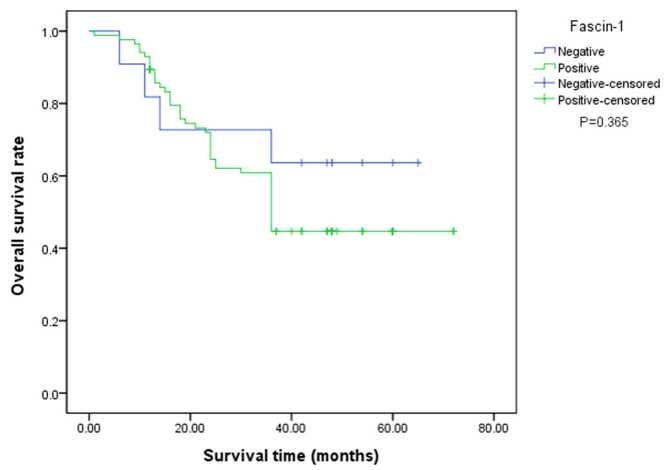

Figure S2. Effects of fascin-1 on MMP-9 and EMT markers in FaDu cells. Western blotting results demonstrated that, compared with in the control cells, the expression levels of MMP-9 and proteins associated with EMT, including E-cadherin and vimentin, were not significantly different in FaDu cells transfected with (A) fascin-1 siRNA or (B) fascin-1 expression plasmids.  $\beta$ -actin was used as an internal reference. EMT, epithelial-mesenchymal transition; MMP, matrix metalloproteinase; siRNA, small interfering RNA.

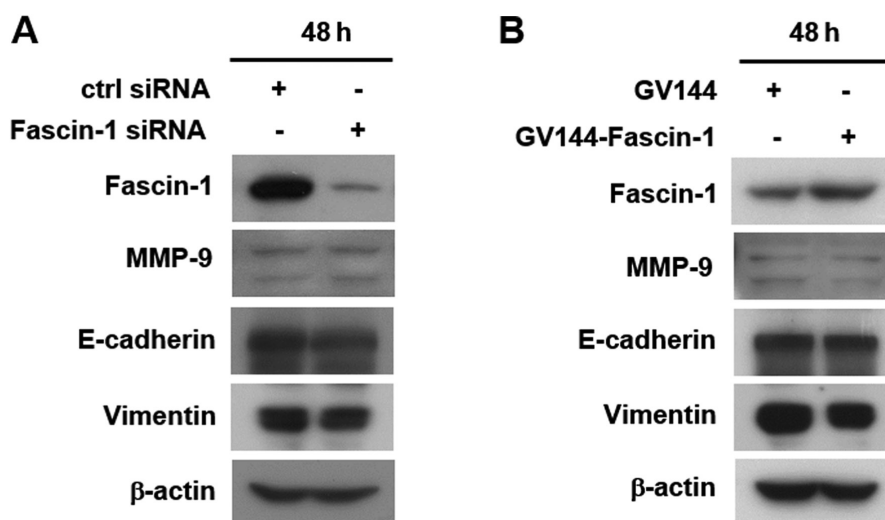

Supplement: Supplementary_data.pdf [file Supplementary_data.pdf]
